# Supplementary material
Source: Springer Nature journal article supplement (https://www.springermedizin.de/resource/supplementary/12936_2008_732_MOESM5_ESM.pdf/9548116)

**A** 4-day treatment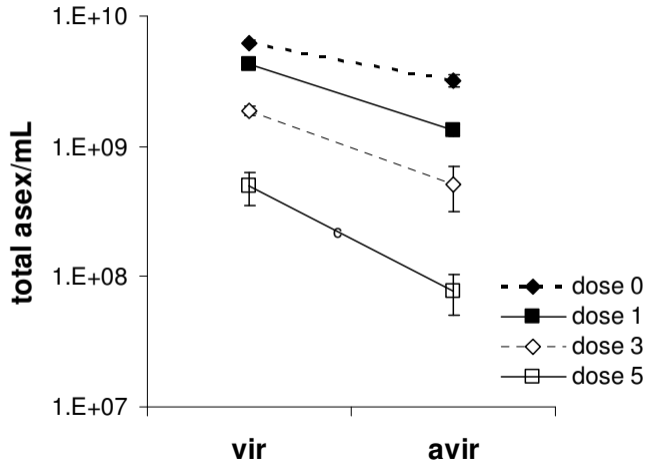**B** 1-day treatment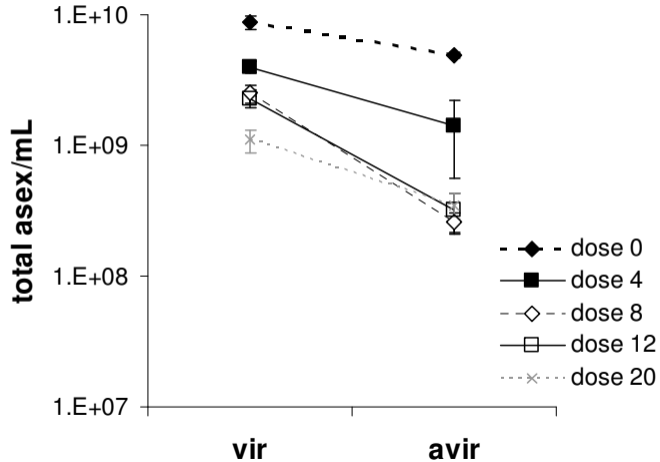

Supplement: MOESM5 [file 9548116]
